# Supplementary material for: Mangrove Forest Landcover Changes in Coastal Vietnam: A Case Study from 1973 to 2020 in Thanh Hoa and Nghe An Provinces
Source: MDPI journal article supplement (doi:10.3390/f12050637), 2021-05-18
Supplement: s1 [file s1]

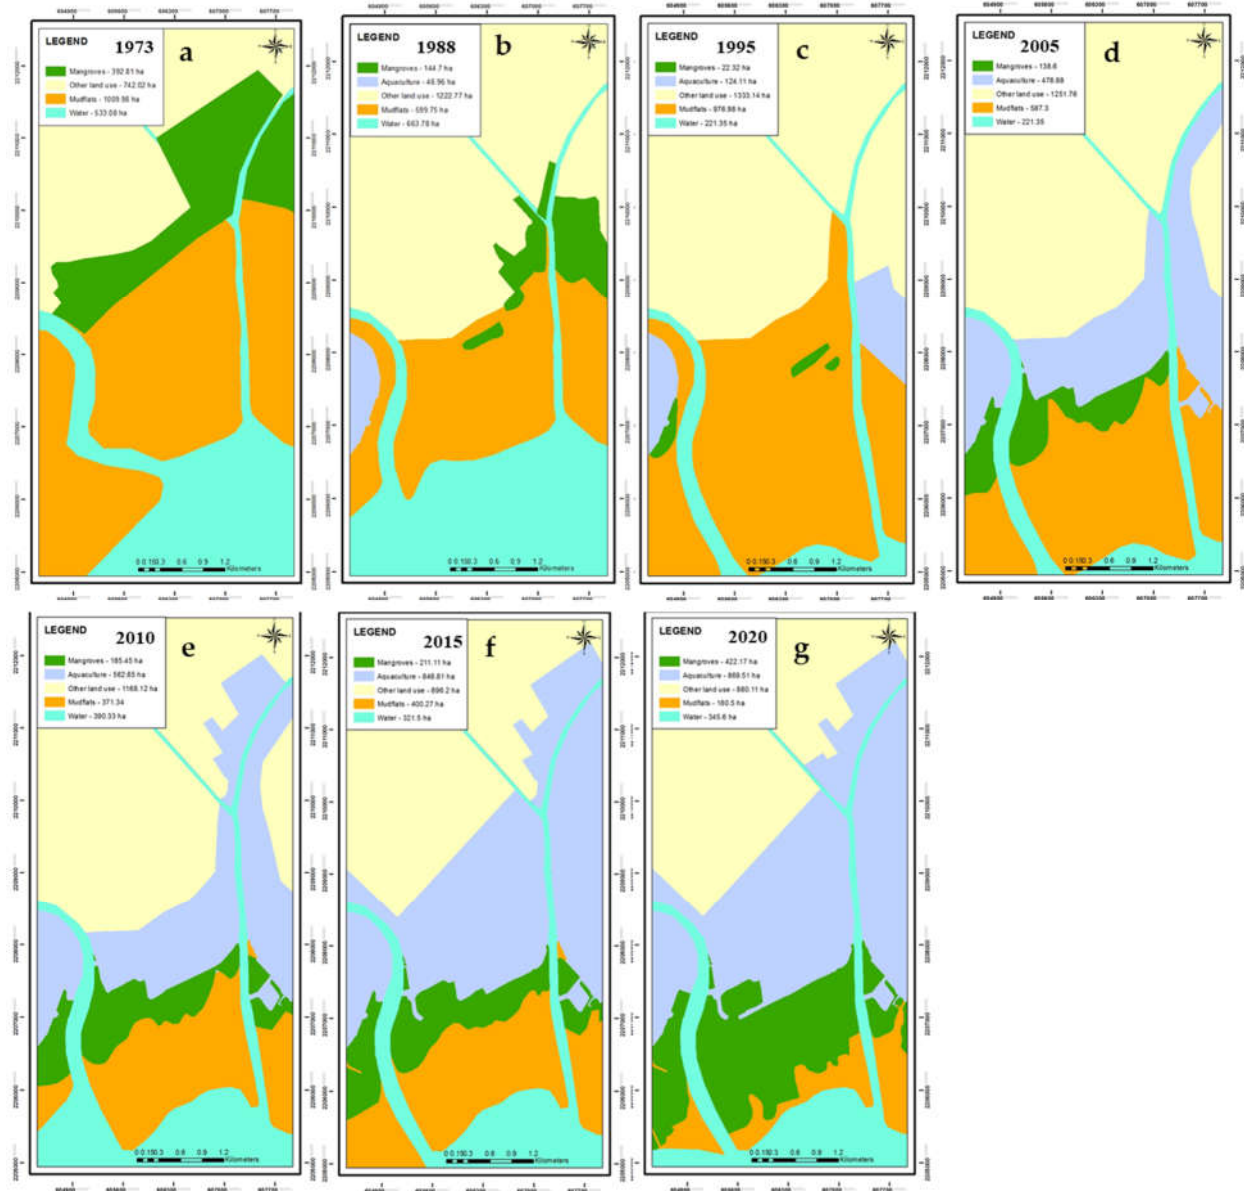

Figure S1. NDVI LULC classification map of the river mouth in Nga Son district – Thanh Hoa province obtained from Landsat 1 for 1973 (a), Landsat 5 for 1988 (b), 1995 (c), 2005 (d) and 2010 (e), and Landsat 8 for 2015 (f) and 2020 (g).

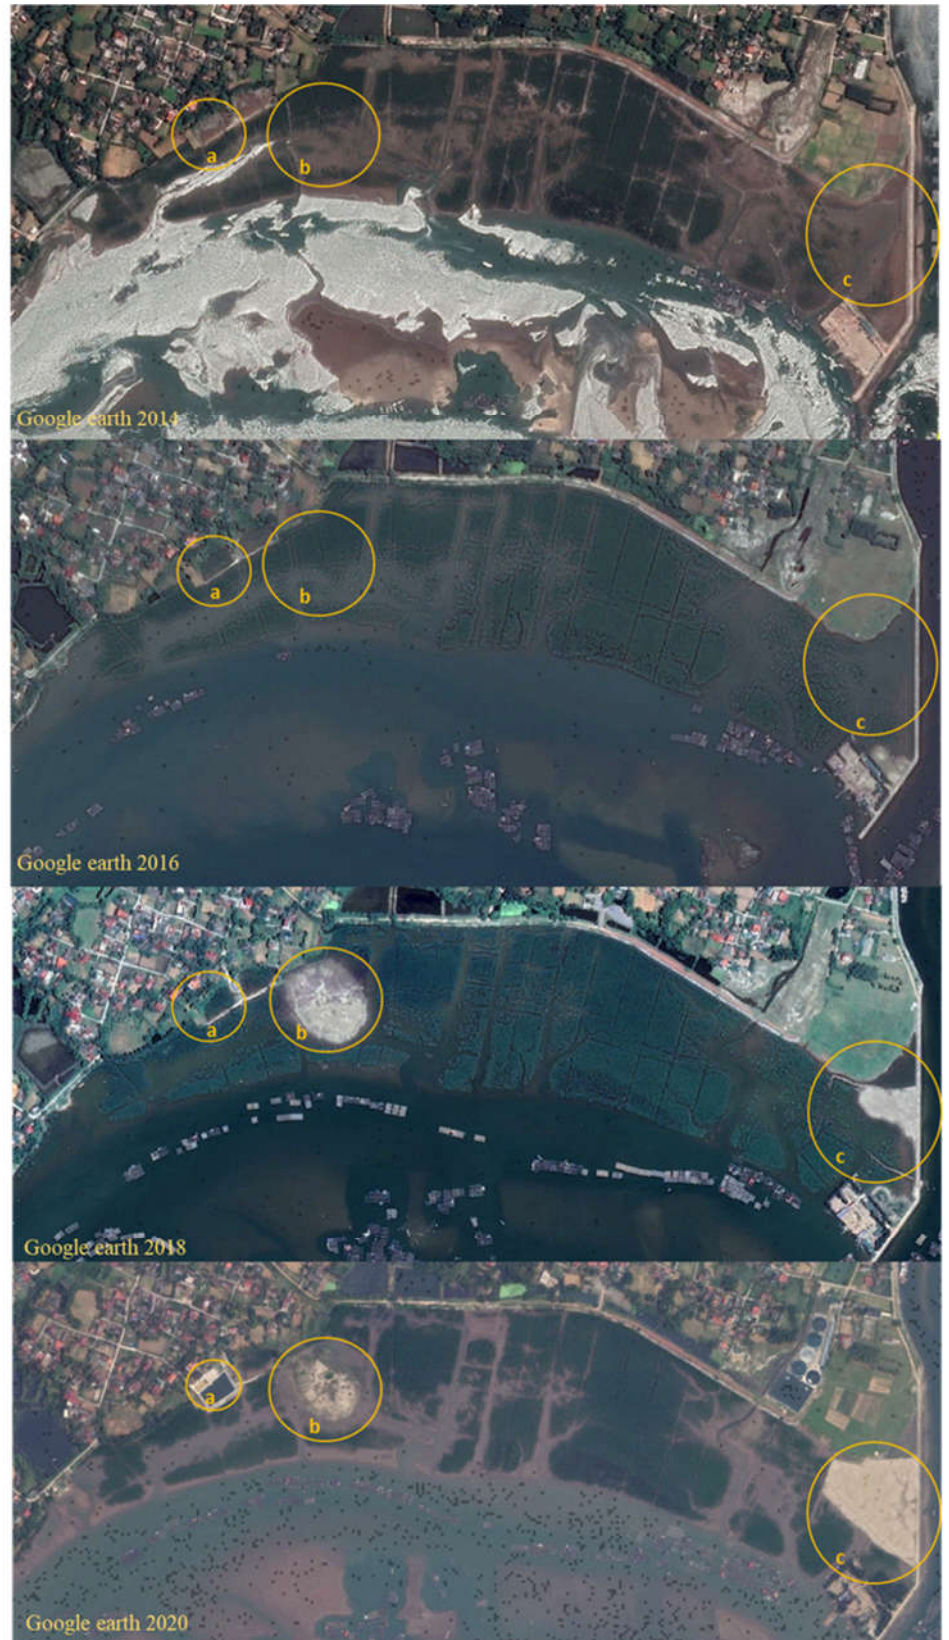

Figure S2. Loss of planted mangroves from aquaculture (a) and other land use (b, c) in Tinh Gia district, Thanh Hoa province from 2014 to 2020.

Table S1: Mangrove restoration projects funded by NGOs in Thanh Hoa and Nghe An provinces from the 1990s to 2020.

| Program                    | Area<br>(ha) | planted | Period    | Species                                                                          | Reference |
|----------------------------|--------------|---------|-----------|----------------------------------------------------------------------------------|-----------|
| <b>Thanh Hoa</b>           |              |         |           |                                                                                  |           |
| IFRC/JRC                   | 1245         |         | 1997-2010 | <i>Kandelia candel</i> , <i>Sonneratia apetala</i> , <i>S. caseolaris</i>        | (1, 2)    |
| CDF                        | 200          |         | 2010-2015 |                                                                                  | (3)       |
| ACTMANG                    | 147          |         | 1999-2000 | <i>Rhizophora stylosa</i>                                                        | (1)       |
| CARE                       | 458          |         | 2006-2014 | <i>Kandelia candel</i>                                                           | (4, 5)    |
| SCF UK                     | 275          |         | 1994-1996 | <i>Kandelia obovata</i> ,<br><i>Avicennia marina</i> , <i>Rhizophora stylosa</i> | (1)       |
| UNICEF UK<br>(773 Project) | 115          |         | 1990-1993 | <i>Aegiceras corniculatum</i> ,<br><i>Bruguiera</i> spp.                         | (1)       |
| PAM                        | 255          |         | 1992-1997 | <i>Aegiceras corniculatum</i> ,<br><i>Bruguiera</i> spp.                         | (1)       |
| GCF/UNDP                   | 350          |         | 2018-2021 | N/A                                                                              | (6)       |
| WB                         | 482          |         | 2017-2023 |                                                                                  | (7, 8)    |
| <b>Nghe An</b>             |              |         |           |                                                                                  |           |
| IFRC/JRC                   | 1096         |         | 1997-2010 | <i>Kandelia obovata</i>                                                          | (1)       |
| SCF UK                     | 184          |         | 1994-1996 | <i>Avicennia marina</i> , <i>Kandelia obovata</i> , <i>Rhizophora stylosa</i>    | (1)       |
| WB                         | 158          |         | 2017-2023 | N/A                                                                              | (7, 8)    |

**ACTMANG:** Action for mangrove reforestation, **AFoCo:** Asian Forest Cooperation Organization, **CARE:** Cooperative for Assistance and Relief Everywhere, **DRC:** Danish Red Cross, **IFRC:** Federation of Red Cross, **JRC:** Japanese Red Cross, **GCF:** Green Climate Fund, **UNPD:** The United Nations Development Program, **IWMC:** Integrated water resource management and urban planning related to climate change, **JICA:** Japan International Cooperation Agency, **Oxfam GB:** Oxfam Great Britain, **PAM** (or WFP – the World Food Program);, **SCF-UK:** Safe the Children Fund THE UNITED KINGDOM, **SDC:** Suma-Denmark Component, **TEPCO:** Tokyo Electric Power Company, **UNICEF UK:** UNICEF United Kingdom, **WB:** world bank, **CDF:** Central Disaster Fund

Table S2: Mangrove restoration funded by the Vietnam government in Thanh Hoa and Nghe An province from the 1990s to 2020.

| <b>Program</b>                                                                                      | <b>Area<br/>planted (ha)</b> | <b>Period</b> | <b>Reference</b> |
|-----------------------------------------------------------------------------------------------------|------------------------------|---------------|------------------|
| <b>Thanh Hoa</b>                                                                                    |                              |               |                  |
| National Target Programme to Respond to Climate Change                                              | 300                          | 2014-2015     | (3)              |
| Support Program to Respond to Climate Change (SP-RCC)                                               | 112                          | 2015-2020     | (3)              |
| Program to consolidate, protect and upgrade sea dykes                                               | 100                          | 2015-2020     | (3)              |
| Project on plating and restoration of coastal forests in Thanh Hoa                                  | 228                          | 2016- 2020    | (9)              |
| Sea dyke maintenance                                                                                | 29.6                         | 2015-2017     | (10-12)          |
| <b>Nghe An</b>                                                                                      |                              |               |                  |
| Forest Protection and Development Plan for the period of 2011-2020                                  | 211.1                        | 2012-2020     | (13, 14)         |
| SP-RCC (funds provided for dyke and irrigation projects which include mangrove plantation category) | 92.6                         | 2014-2015     | (3)              |
| Program to consolidate, protect and upgrade sea dykes                                               | 280                          | 2015-2020     | (3)              |
